# Supplementary material for: Adult Neural Stem Cells from Midbrain Periventricular Regions Show Limited Neurogenic Potential after Transplantation into the Hippocampal Neurogenic Niche
Source: MDPI journal article supplement (doi:10.3390/cells10113021), 2021-11-04
Supplement: s1 [file s1]

## Supplementary Information

### Adult neural stem cells from midbrain periventricular regions show limited neurogenic potential after transplantation into the hippocampal neurogenic niche

*Mareike Fauser, Kai Loewenbrück, Johannes Rangnick, Moritz D. Brandt, Andreas Hermann, Alexander Storch*

#### Supplementary Tables:

**Supplementary Tables S1-S9.** Statistical results of two-way mixed ANOVA.

#### Supplementary Figures:

**Supplementary Figure S1:** Subregional distribution of Sox2<sup>+</sup> neural stem cells and NeuroD1<sup>+</sup> immature neurons 7 days after transplantation.

**Supplementary Figure S2:** Subregional distribution of NG2<sup>+</sup> oligodendroglial progenitor cells 7 days after transplantation.

**Supplementary Table S1:** Statistics determined for the relative amounts of surviving GFP<sup>+</sup> cells after transplantation within the different hippocampal regions depending on graft origin (**Figure 2D**). Two-way mixed ANOVA showed significant main effects of hippocampal region on GFP<sup>+</sup> cell numbers (proportion of GFP<sup>+</sup> cells per region) overall ( $F(1,35)=11.21$ ,  $P=0.001$ , with Greenhouse-Geisser correction). There was no significant interaction between hippocampal region and transplanted aNSC type (PVR<sub>V-SVZ</sub> vs. PVR<sub>MB</sub>) in terms of GFP<sup>+</sup> cell survival ( $F(1,35)=2.84$ ,  $P=0.092$ , with Greenhouse-Geisser correction). There was no significant main effect of transplanted aNSC type on GFP<sup>+</sup> cell survival ( $F(1,29)=0.0$ ,  $P=1.000$ ). Results of *post-hoc* t-tests with Bonferroni adjustment revealed the *P*-values as displayed in (A) for significances among the different hippocampal regions.

**A**

|                                           | PVR <sub>V-SVZ</sub> | PVR <sub>MB</sub> |
|-------------------------------------------|----------------------|-------------------|
| <b>Subgranular Zone vs. Granular Zone</b> | <b>&lt;0.001</b>     | <b>&lt;0.001</b>  |
| <b>Subgranular Zone vs. Hilus</b>         | 0.082                | 1.000             |
| <b>Granular Zone vs. Hilus</b>            | 1.000                | <b>0.008</b>      |

**Supplementary Table S2:** Statistics determined for the relative amounts of proliferating GFP<sup>+</sup> cells (BrdU<sup>+</sup>/GFP<sup>+</sup> cells) after transplantation within the different hippocampal regions depending on graft origin (**Figure 2F**). Two-way mixed ANOVA showed significant main effects of hippocampal region on BrdU<sup>+</sup>/GFP<sup>+</sup> cells numbers (proportion of BrdU<sup>+</sup>/GFP<sup>+</sup> cells per region) overall ( $F(2,45)=5.30$ ,  $P=0.012$ , with Greenhouse-Geisser correction). There was no significant interaction between hippocampal region and transplanted aNSC type (PVR<sub>V-SVZ</sub> vs. PVR<sub>MB</sub>) in terms of BrdU<sup>+</sup> cell amounts ( $F(2,45)=0.79$ ,  $P=0.441$ , with Greenhouse-Geisser correction). There was no significant main effect of transplanted aNSC type on BrdU<sup>+</sup> cell amounts ( $F(1,27)=2.23$ ,  $P=0.147$ ). Results of *post-hoc* t-tests with Bonferroni adjustment revealed the *P*-values as displayed in (**A**) for significances among the different hippocampal regions.

**A**

|                                           | PVR <sub>V-SVZ</sub> | PVR <sub>MB</sub> |
|-------------------------------------------|----------------------|-------------------|
| <b>Subgranular Zone vs. Granular Zone</b> | 1.000                | 1.000             |
| <b>Subgranular Zone vs. Hilus</b>         | <b>0.044</b>         | 0.151             |
| <b>Granular Zone vs. Hilus</b>            | 0.186                | 0.409             |

**Supplementary Table S3:** Statistics determined for the total relative amounts of GFP<sup>+</sup>/Sox2<sup>+</sup> cells after transplantation within the different hippocampal regions (SGZ, GZ) depending on graft origin (**Supplementary Figure S1A**). Two-way mixed ANOVA showed no significant main effect of hippocampal region on GFP<sup>+</sup>/Sox2<sup>+</sup> cell numbers (proportion of GFP<sup>+</sup>/Sox2<sup>+</sup> cells per region) overall ( $F(1,19)=0.55$ ,  $P=0.466$ ). There was no significant interaction between hippocampal region and transplanted aNSC type (PVR<sub>V-SVZ</sub> vs. PVR<sub>MB</sub>) in terms of total Sox2<sup>+</sup> cell amounts ( $F(1,19)=0.20$ ,  $P=0.658$ ). There was no significant main effect of transplanted aNSC type (PVR<sub>V-SVZ</sub> vs. PVR<sub>MB</sub>) on total GFP<sup>+</sup>/Sox2<sup>+</sup> cell amounts ( $F(1,19)=0.66$ ,  $P=0.425$ ).

**Supplementary Table S4:** Statistics determined for BrdU labeling index of GFP<sup>+</sup>/Sox2<sup>+</sup> cells after transplantation within the different hippocampal regions (SGZ, GZ) depending on graft origin (**Supplementary Figure S1B**). Two-way mixed ANOVA showed significant main effects of hippocampal region on GFP<sup>+</sup>/Sox2<sup>+</sup>/BrdU<sup>+</sup> cell numbers overall ( $F(1,16)=1.88$ ,  $P<0.001$ ). There was no significant interaction between hippocampal region and transplanted aNSC type (PVR<sub>V-SVZ</sub> vs. PVR<sub>MB</sub>) in terms of Sox2<sup>+</sup>/BrdU<sup>+</sup> cell amounts ( $F(1,16)=0.18$ ,  $P=0.679$ ). There was no significant main effect of transplanted aNSC type on GFP<sup>+</sup>/Sox2<sup>+</sup>/BrdU<sup>+</sup> cell amounts ( $F(1,16)=0.42$ ,  $P=0.528$ ).

**Supplementary Table S5:** Statistics determined for the relative amounts of surviving GFP<sup>+</sup> cells after transplantation within the different hippocampal regions (SGZ, GZ) depending on running of host animal. Two-way mixed ANOVA showed significant main effects of hippocampal region on GFP<sup>+</sup> cell numbers (proportion of GFP<sup>+</sup> cells per region) overall ( $F(2,13)=40.81$ ,  $P<0.001$ , with Greenhouse-Geisser correction). There was no significant interaction between hippocampal region and running group (running vs. control) in terms of GFP<sup>+</sup> cell survival ( $F(2,13)=1.58$ ,  $P=0.239$ , with Greenhouse-Geisser correction). There was no significant main effect of running group (running vs. control) on GFP<sup>+</sup> cell survival ( $F(1,9)=0.05$ ,  $P=0.828$ ). Results of *post-hoc* t-tests with Bonferroni adjustment revealed the *P*-values as displayed in **(A)** for significances among the different hippocampal regions.

**A**

|                                           | Runners      | Controls     |
|-------------------------------------------|--------------|--------------|
| <b>Subgranular Zone vs. Granular Zone</b> | <b>0.001</b> | <b>0.002</b> |
| <b>Subgranular Zone vs. Hilus</b>         | 0.898        | 1.000        |
| <b>Granular Zone vs. Hilus</b>            | <b>0.004</b> | <b>0.008</b> |

**Supplementary Table S6:** Statistics determined for the BrdU labeling index of GFP<sup>+</sup> cells after transplantation of PVR<sub>V-SVZ</sub> aNSC within the different hippocampal regions (SGZ, GZ) depending on running of host animal. Two-way mixed ANOVA showed no significant main effect of hippocampal region on BrdU<sup>+</sup>/GFP<sup>+</sup> cells numbers (proportion of BrdU<sup>+</sup>/GFP<sup>+</sup> cells per region) overall ( $F(2,12)=3.38$ ,  $P=0.076$ ). There was no significant interaction between hippocampal region and running group (running vs. control) in terms of BrdU<sup>+</sup> cell amounts ( $F(2,12)=0.147$ ,  $P=0.266$ ). There was no significant main effect of running group type on BrdU<sup>+</sup> cell amounts ( $F(1,7)=0.05$ ,  $P=0.828$ ).

**Supplementary Table S7:** Statistics determined for the relative amounts of GFP<sup>+</sup>/Sox2<sup>+</sup> cells after transplantation within the different hippocampal regions (SGZ, GZ) depending on running of host animals. Two-way mixed ANOVA showed no significant main effect of hippocampal region on GFP<sup>+</sup>/Sox2<sup>+</sup> cell numbers (proportion of GFP<sup>+</sup>/Sox2<sup>+</sup> cells per region) overall ( $F(1,6)=0.87$ ,  $P=0.387$ ). There was no significant interaction between hippocampal region and running groups (runners vs. controls) in terms of total Sox2<sup>+</sup> cell amounts ( $F(1,6)=0.109$ ,  $P=0.337$ ). There was no significant main effect of running group (runners vs. controls) on total GFP<sup>+</sup>/Sox2<sup>+</sup> cell amounts ( $F(1,6)=0.03$ ,  $P=0.877$ ).

**Supplementary Table S8:** Statistics determined for the relative total amounts of GFP<sup>+</sup>/NeuroD1<sup>+</sup> cells after transplantation within the different hippocampal regions depending on graft origin (**Supplementary Figure S1C**). Two-way mixed ANOVA showed significant main effects of hippocampal region on GFP<sup>+</sup>/NeuroD1<sup>+</sup> cell numbers (proportion of GFP<sup>+</sup>/NeuroD1<sup>+</sup> cells per region) overall ( $F(1,11)=16.49$ ,  $P=0.002$ ). There was no significant interaction between hippocampal region and transplanted aNSC type (PVR<sub>V-SVZ</sub> vs. PVR<sub>MB</sub>) in terms of total NeuroD1<sup>+</sup> cell amounts ( $F(1,11)=1.37$ ,  $P=0.266$ ). There was no significant main effect of transplanted aNSC type (PVR<sub>V-SVZ</sub> vs. PVR<sub>MB</sub>) on total GFP<sup>+</sup>/NeuroD1<sup>+</sup> cell amounts ( $F(1,19)=0.31$ ,  $P=0.588$ ). Results of *post-hoc* t-tests the *P*-values as displayed in (**A**) for significances among the different hippocampal regions. Bold values indicate significant differences.

**A**

|                                                                                                 | PVR <sub>V-SVZ</sub> | PVR <sub>MB</sub> |
|-------------------------------------------------------------------------------------------------|----------------------|-------------------|
| <b>GFP<sup>+</sup>/NeuroD1<sup>+</sup> in SGZ vs. GFP<sup>+</sup>/NeuroD1<sup>+</sup> in GZ</b> | <b>0.040</b>         | <b>0.007</b>      |

**Supplementary Table S9:** Statistics determined for the relative total amounts of GFP<sup>+</sup>/NG2<sup>+</sup> cells after transplantation within the different hippocampal regions depending on graft origin (**Supplementary Figure S2B**). Two-way mixed ANOVA showed significant main effects of hippocampal region on GFP<sup>+</sup>/NG2<sup>+</sup> cell numbers (proportion of GFP<sup>+</sup>/NG2<sup>+</sup> cells per region) overall ( $F(1,7)=0.06$ ,  $P=0.817$ ). There was no significant interaction between hippocampal region and transplanted aNSC type (PVR<sub>V-SVZ</sub> vs. PVR<sub>MB</sub>) in terms of total NG2<sup>+</sup> cell amounts ( $F(1,7)=2.74$ ,  $P=0.142$ ). There was no significant main effect of transplanted aNSC type (PVR<sub>V-SVZ</sub> vs. PVR<sub>MB</sub>) on total GFP<sup>+</sup>/NG2<sup>+</sup> cell amounts ( $F(1,7)=1.51$ ,  $P=0.259$ ).

## Supplementary Figures & Legends to Supplementary Figures

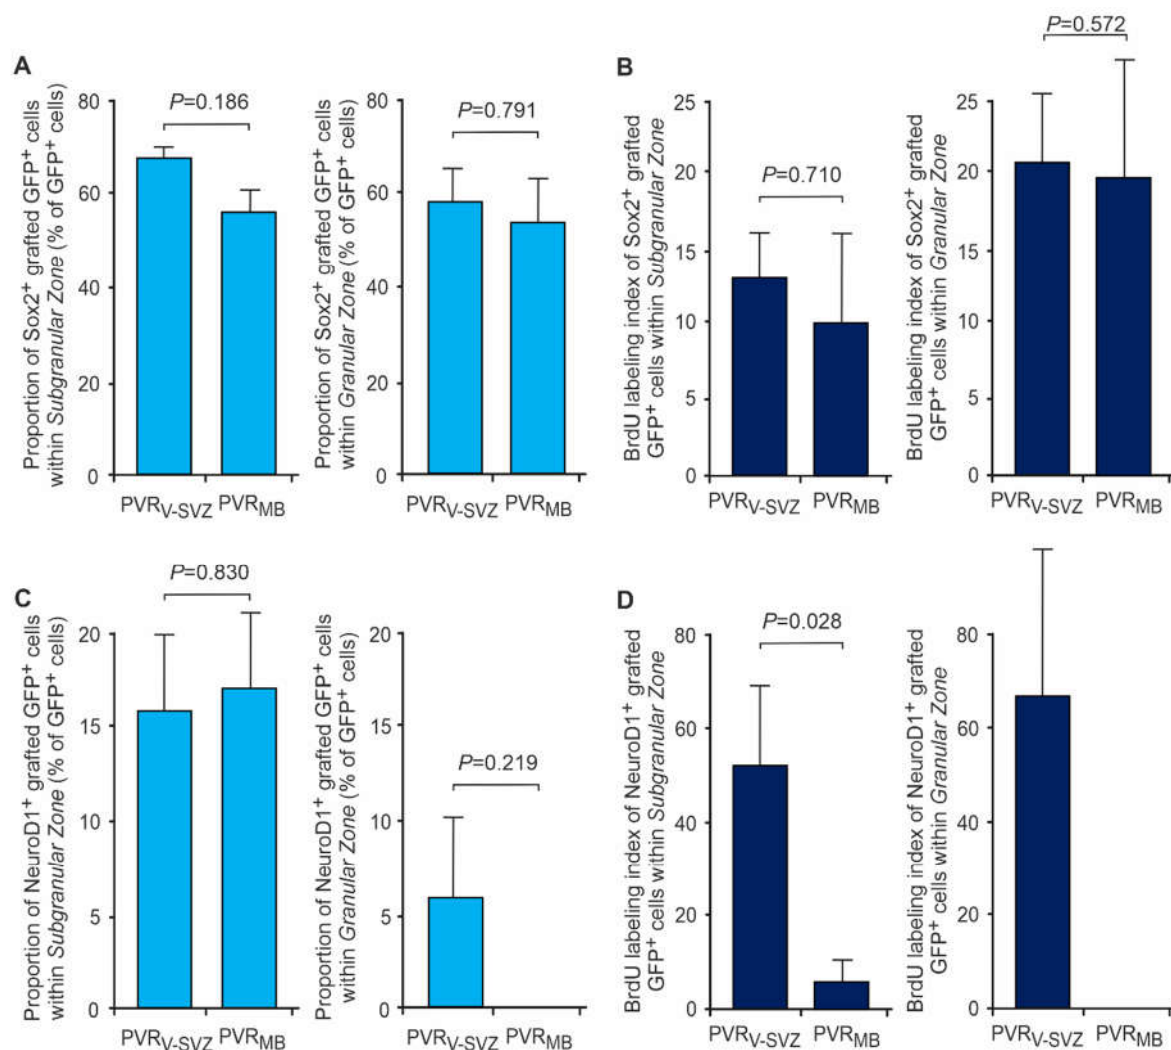

**Supplementary Figure S1: Subregional distribution of Sox2<sup>+</sup> neural stem cells and NeuroD1<sup>+</sup> immature neurons 7 days after transplantation.**

(A,B) Relative Sox2<sup>+</sup> cell counts normalized to total GFP<sup>+</sup> grafted cell counts within the two main subregions of the DG, namely the SGZ and the GZ. Sox2<sup>+</sup> cell counts as well as BrdU labeling index of Sox2<sup>+</sup> cells counts did not differ between the two grafts (PVR<sub>V-SVZ</sub> vs. PVR<sub>MB</sub>)

in both DG subregions ( $P \geq 0.05$ , two-way mixed ANOVA with hippocampal region [SGZ, GS] and transplanted aNSC type [PVR<sub>V-SVZ</sub> vs. PVR<sub>MB</sub>] as independent variables; see **Supplementary Table S3,S4** for statistical results). *P*-values are from *post-hoc* t-tests with Bonferroni adjustment for multiple comparisons (PVR<sub>V-SVZ</sub> n=7; PVR<sub>MB</sub> n=21). **(C,D)** Relative NeuroD1<sup>+</sup> cell counts normalized to total GFP<sup>+</sup> grafted cell counts within SGZ and GZ. NeuroD1<sup>+</sup> cells counts varied significantly between the subregions, but did not differ between the two grafts in both DG subregions (see **Supplementary Table S8** for statistical results). BrdU labeling index of NeuroD1<sup>+</sup> cells differed between the grafts in the SGZ. *P*-values are from *post-hoc* t-tests with Bonferroni adjustment for multiple comparisons for NeuroD1<sup>+</sup> cell counts and unpaired t-test für BrdU labeling index in SGZ (PVR<sub>V-SVZ</sub> n=8; PVR<sub>MB</sub> n=7).

**Abbreviations:** PVR<sub>V-SVZ</sub> - periventricular region of the ventricular-subventricular zone of the lateral wall of the lateral ventricles; PVR<sub>MB</sub> – periventricular region of the midbrain; aNSC – adult neural stem cell; SGZ - subgranular zone; GZ - granular zone; GFP - green fluorescent protein; BrdU - 5'-bromo-2'-desoxyuridine; DG - dentate gyrus.



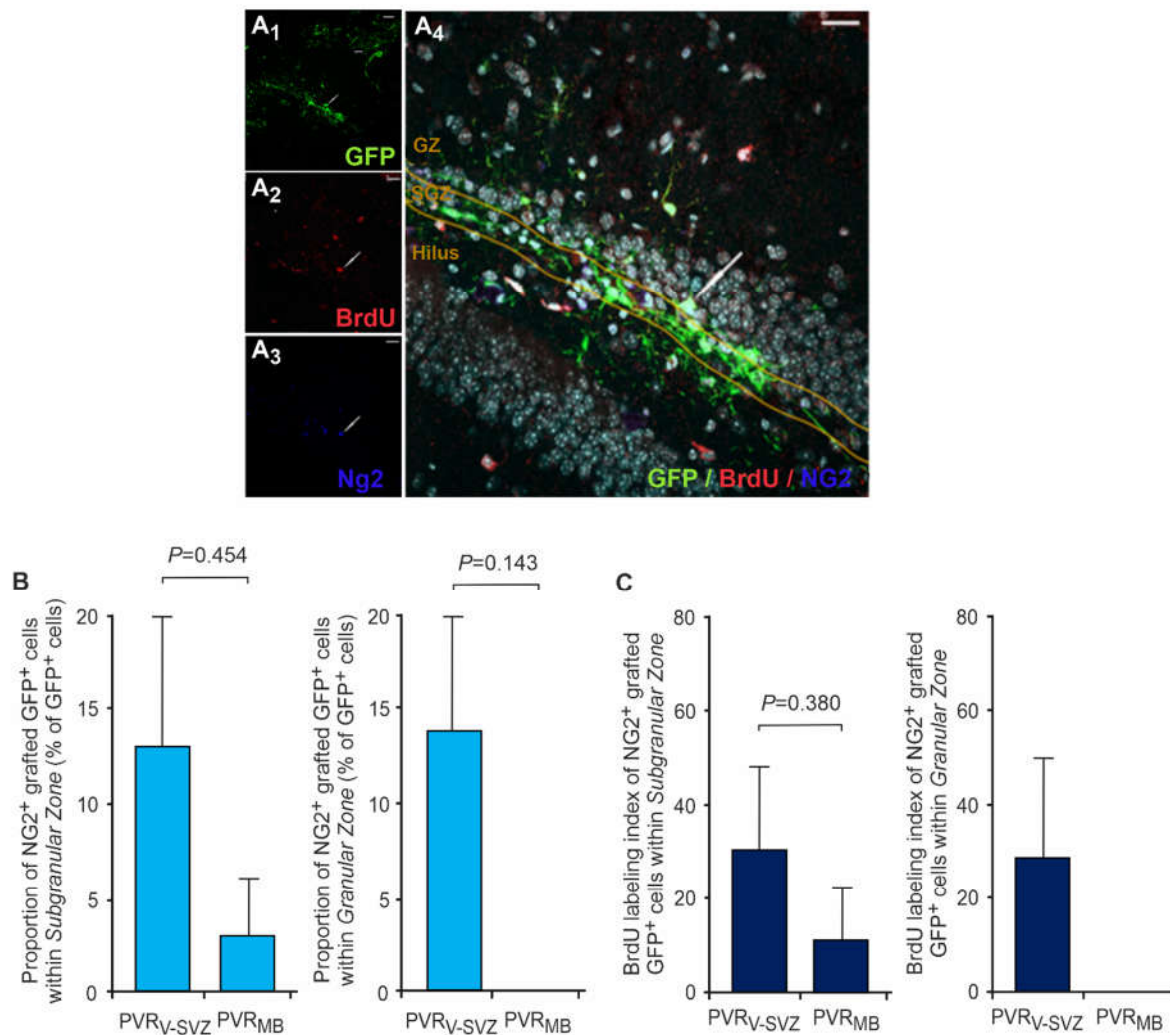

**Supplementary Figure S2: Subregional distribution of NG2<sup>+</sup> oligodendroglial progenitor cells 7 days after transplantation.**

(A) Representative triple fluorescence immunostaining of a PVR<sub>V-SVZ</sub> graft within the DG (the arrow illustrates a GFP<sup>+</sup>/BrdU<sup>+</sup>/NG2<sup>+</sup> grafted polydendrocyte; A<sub>4</sub>). GFP identifies transplanted cells, (green, A<sub>1</sub>), BrdU (red, A<sub>2</sub>) indicates cells which proliferated after transplantation and NG2 serves as a marker for polydendrocytes (blue, A<sub>3</sub>). Scale bars, 10  $\mu$ m. (B) Relative NG2<sup>+</sup> cell counts normalized to total GFP<sup>+</sup> grafted cell counts within SGZ and GZ. NG2<sup>+</sup> and BrdU

labeling index of NG2<sup>+</sup> polydendrocyte counts did not differ between the two grafts in both DG subregions (see **Supplementary Table S9** for statistical results). *P*-values are from *post-hoc* t-tests with Bonferroni adjustment for multiple comparisons for NG2<sup>+</sup> cell counts and unpaired t-test für BrdU labeling index in SGZ (PVR<sub>V-SVZ</sub> n=7; PVR<sub>MB</sub> n=8).

**Abbreviations:** PVR<sub>V-SVZ</sub> - periventricular region of the ventricular-subventricular zone of the lateral ventricles; PVR<sub>MB</sub> – periventricular region of the midbrain; aNSC – adult neural stem cell; SGZ - subgranular zone; GZ - granular zone; GFP - green fluorescent protein; BrdU - 5'-bromo-2'-desoxyuridine.
